# Supplementary material
Source: Springer Nature journal article supplement (https://www.springermedizin.de/resource/supplementary/13020_2012_161_MOESM4_ESM.pdf/9641106)

$\alpha$ -mangostein (nM)

12.0

6.0

-

-

LPS (200 ng/ml)

+

+

+

-

phospho- p38

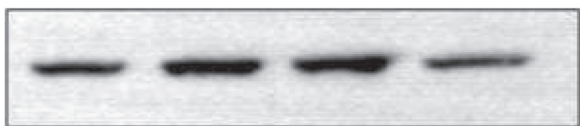

phospho- ERK1/2

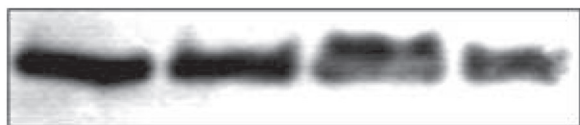

phospho- JNK

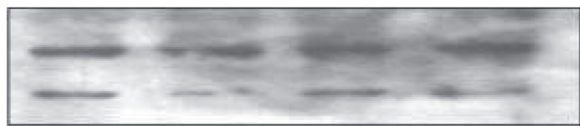

$\beta$ -tublin

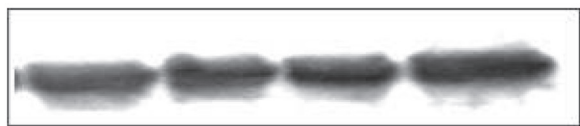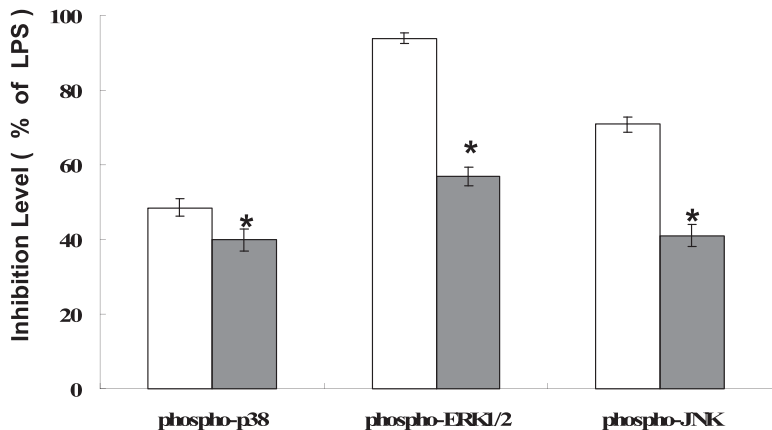

Supplement: MOESM4 [file 9641106]
